# Supplementary material for: Synthesis of amine-bridged bis(phenolate) rare-earth metal aryloxides and their catalytic performances for the ring-opening polymerization of l-lactic acid O-carboxyanhydride and l-lactide
Source: Royal Society of Chemistry journal article supplement (doi:10.1039/c7dt03001k), 2017-01-01
Supplement: c7dt03001k1.pdf [file c7dt03001k1.pdf]

## Supporting Information

### Synthesis of amine-bridged bis(phenolate) rare-earth metal aryloxides and their catalytic performances for the ring-opening polymerization of $L$ -lactic acid $O$ -carboxyanhydride and $L$ -lactide

Hao Ouyang,<sup>a</sup> Kun Nie,<sup>\*a,b</sup> Dan Yuan,<sup>a</sup> and Yingming Yao<sup>\*,a,c</sup>

*<sup>a</sup>Key Laboratory of Organic Synthesis of Jiangsu Province, and State and Local Joint Engineering Laboratory for Novel Functional Polymeric Materials, College of Chemistry, Chemical Engineering and Materials Science, Dushu Lake Campus, Soochow University, Suzhou 215123, People's Republic of China*

*<sup>b</sup>School of Chemistry and Chemical Engineering, Taishan University, Taian 271021, People's Republic of China*

*<sup>c</sup>State Key Laboratory of Polymer Physics and Chemistry, Changchun Institute of Applied Chemistry, Chinese Academy of Sciences, Changchun 130022, People's Republic of China*

\* To whom correspondence should be addressed. Email: yaoym@suda.edu.cn (Y.

Yao)

# Contents

- Fig. S1**  $^1\text{H}$  NMR spectrum ( $\text{CDCl}_3$ , 25 °C) of  ${}_L$ -lacOCA
- Fig. S2**  $^{13}\text{C}$  NMR spectrum ( $\text{CDCl}_3$ , 25 °C) of  ${}_L$ -lacOCA
- Fig. S3**  $^1\text{H}$  NMR spectrum (DMSO, 25 °C) of complex **1**
- Fig. S4**  $^{13}\text{C}$  NMR spectrum (DMSO, 25 °C) of complex **1**
- Fig. S5**  $^1\text{H}$  NMR spectrum ( $\text{C}_6\text{D}_6$ , 25 °C) of complex **2**
- Fig. S6**  $^{13}\text{C}$  NMR spectrum ( $\text{C}_6\text{D}_6$ , 25 °C) of complex **2**
- Fig. S7**  $^1\text{H}$  NMR spectrum ( $\text{C}_6\text{D}_6$ , 25 °C) of complex **3**
- Fig. S8**  $^{13}\text{C}$  NMR spectrum ( $\text{C}_6\text{D}_6$ , 25 °C) of complex **3**
- Fig. S9**  $^1\text{H}$  NMR spectrum ( $d_8$ -THF, 25 °C) of complex **5**
- Fig. S10**  $^{13}\text{C}$  NMR spectrum ( $d_8$ -THF, 25 °C) of complex **5**
- Table S1.** Crystallographic data for complexes **1**, **2**, **3** and **5**
- Table S2.** Selected bond lengths (Å) and bond angles (deg) for complexes **1-5**
- Fig. S11** Solid state structure of **2**.
- Fig. S12** Plot of PLA Mn(■) and polydispersity (▲) as a function of  ${}_L$ -lacOCA conversion initiated by complex **5**
- Fig. S13**  $^1\text{H}$  NMR (normal) spectrum of PLLA obtained from  ${}_L$ -lacOCA.
- Fig. S14**  $^{13}\text{C}$  NMR spectrum of PLLA obtained from  ${}_L$ -lacOCA
- Fig. S15**  $^1\text{H}$  NMR (homodecoupled) spectrum of PLLA obtained from  ${}_L$ -lacOCA
- Fig. S16** DSC thermogram of poly(lactic acid)
- Fig. S17** TGA thermogram of poly(lactic acid)

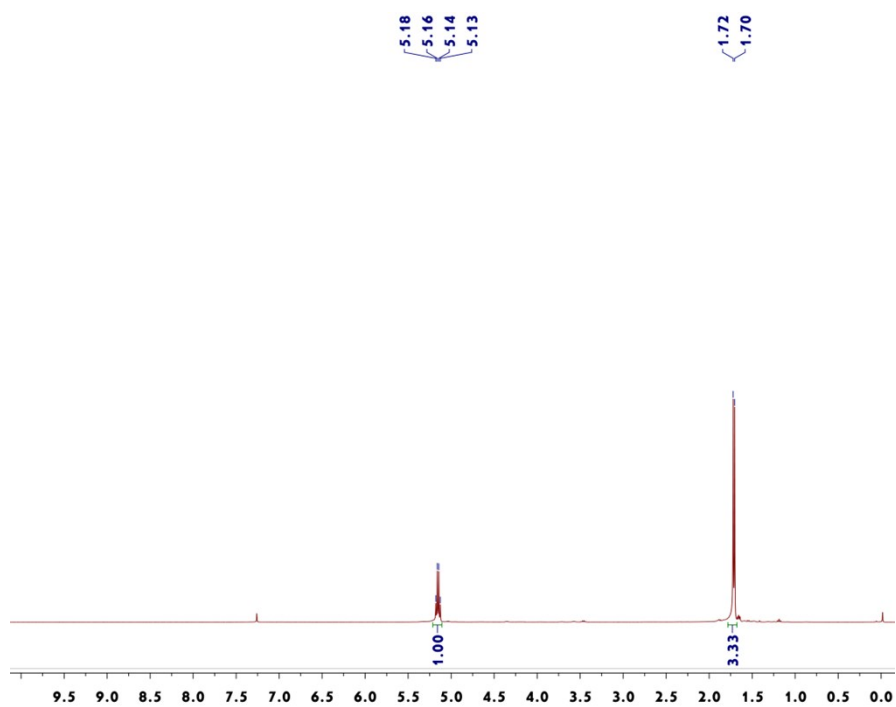

**Fig. S1**  $^1\text{H}$  NMR spectrum ( $\text{CDCl}_3$ , 25  $^\circ\text{C}$ ) of  $\text{L-lacOCA}$

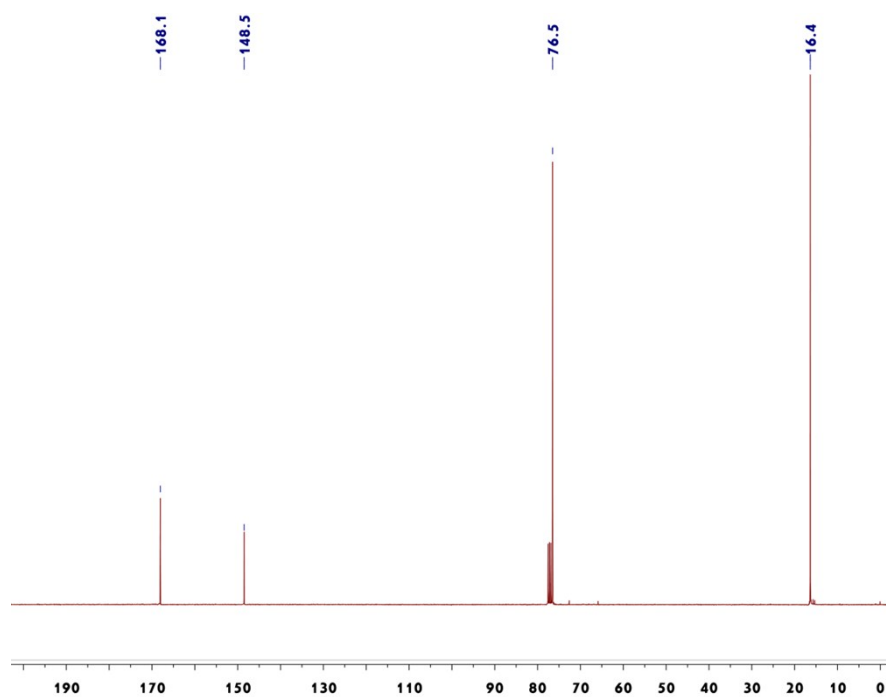

**Fig. S2**  $^{13}\text{C}$  NMR spectrum ( $\text{CDCl}_3$ , 25  $^\circ\text{C}$ ) of  $\text{L-lacOCA}$

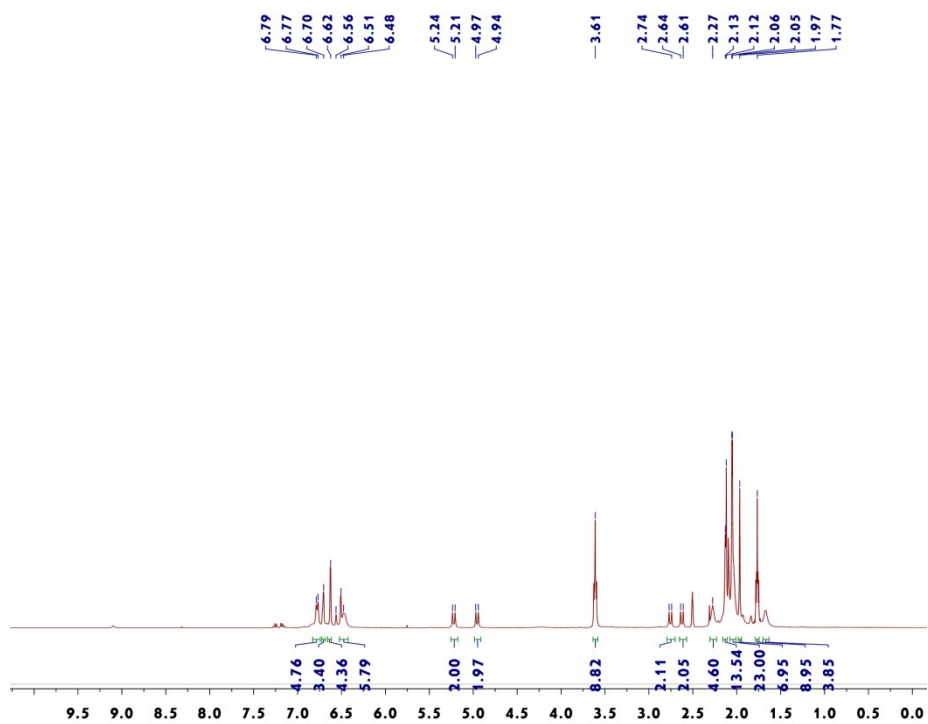

**Fig. S3**  $^1\text{H}$  NMR spectrum (DMSO, 25 °C) of complex **1**

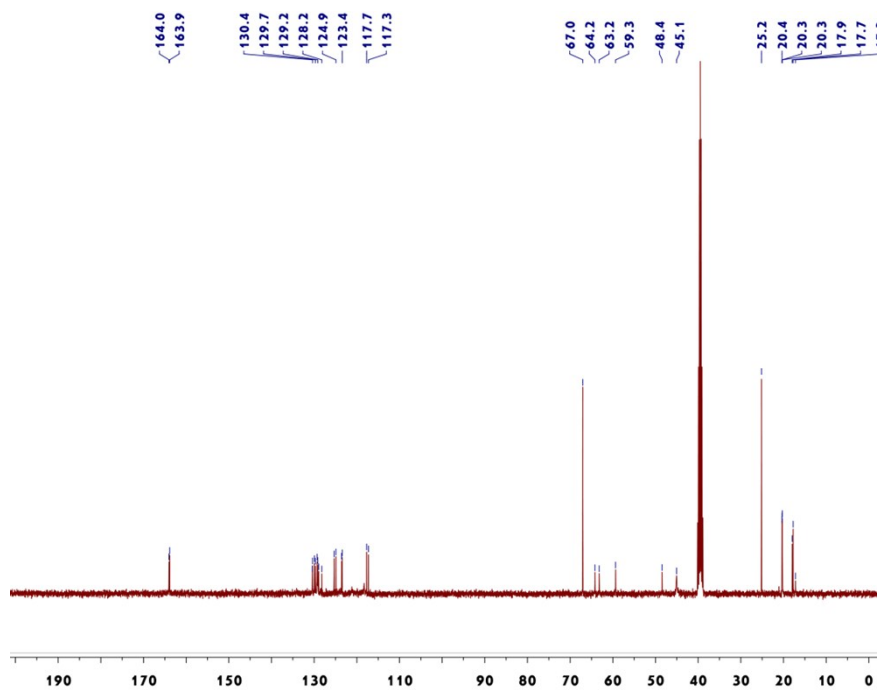

**Fig. S4**  $^{13}\text{C}$  NMR spectrum (DMSO, 25 °C) of complex **1**

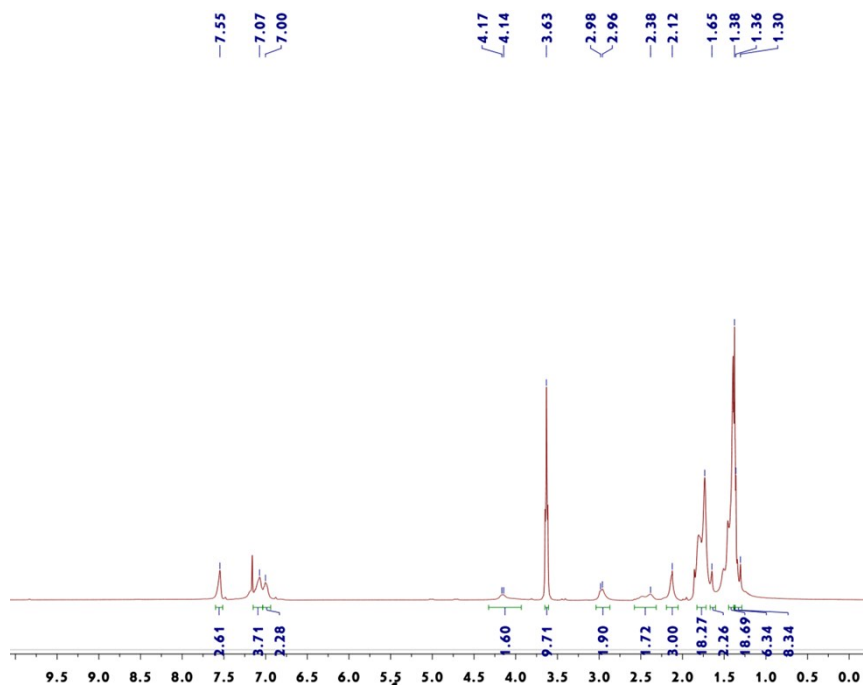

Fig. S5  $^1\text{H}$  NMR spectrum ( $\text{C}_6\text{D}_6$ , 25 °C) of complex 2

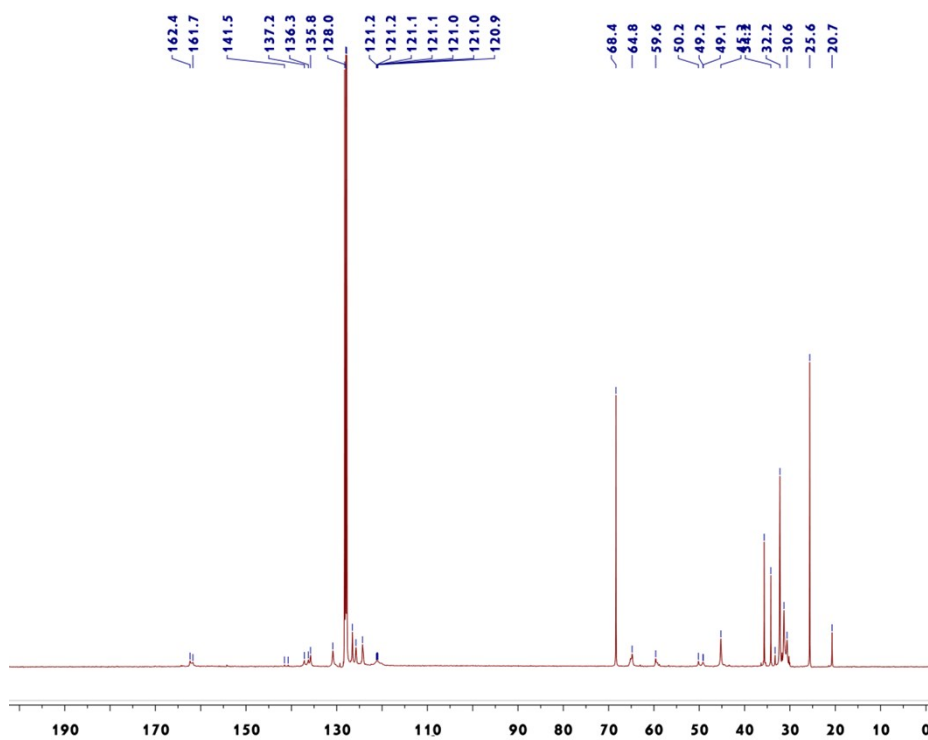

Fig. S6  $^{13}\text{C}$  NMR spectrum ( $\text{C}_6\text{D}_6$ , 25 °C) of complex 2

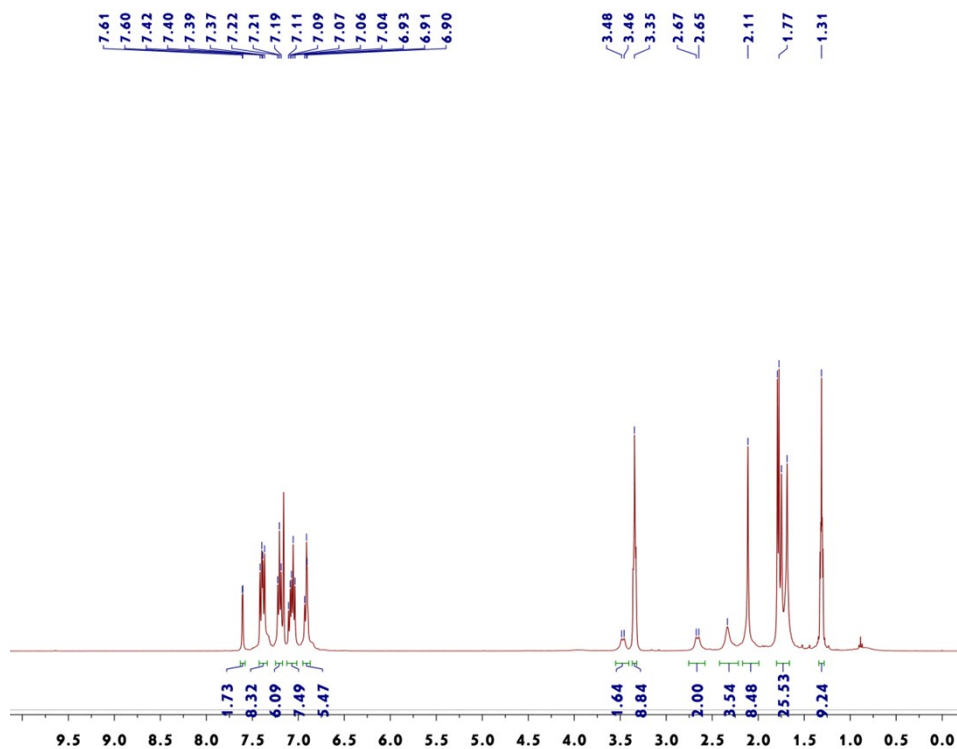

Fig. S7  $^1\text{H}$  NMR spectrum ( $\text{C}_6\text{D}_6$ , 25  $^\circ\text{C}$ ) of complex **3**

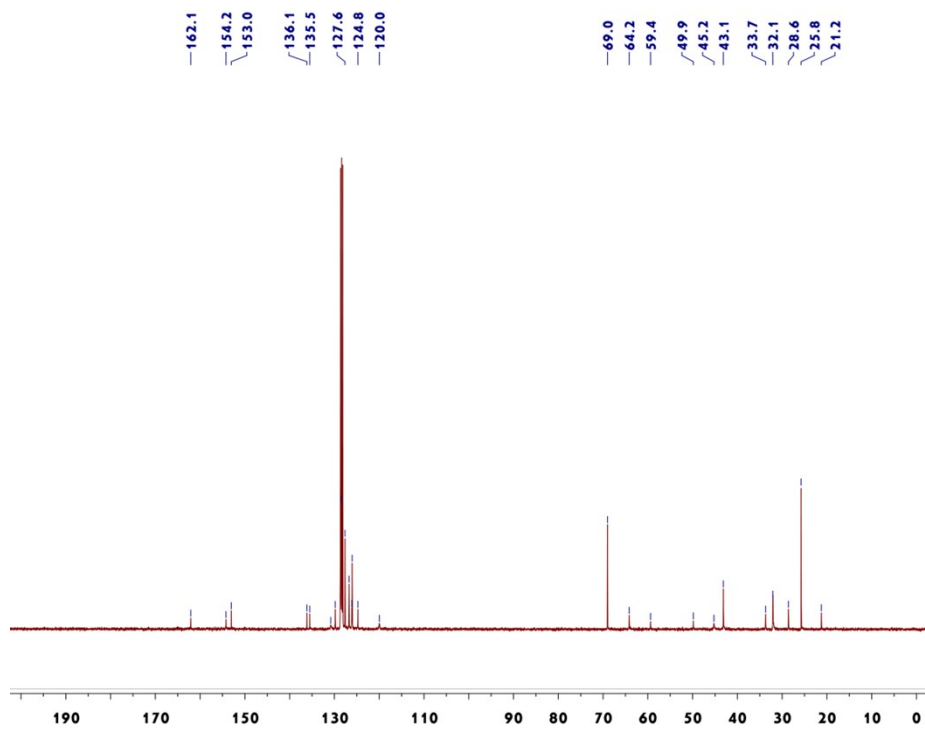

Fig. S8  $^{13}\text{C}$  NMR spectrum ( $\text{C}_6\text{D}_6$ , 25  $^\circ\text{C}$ ) of complex **3**

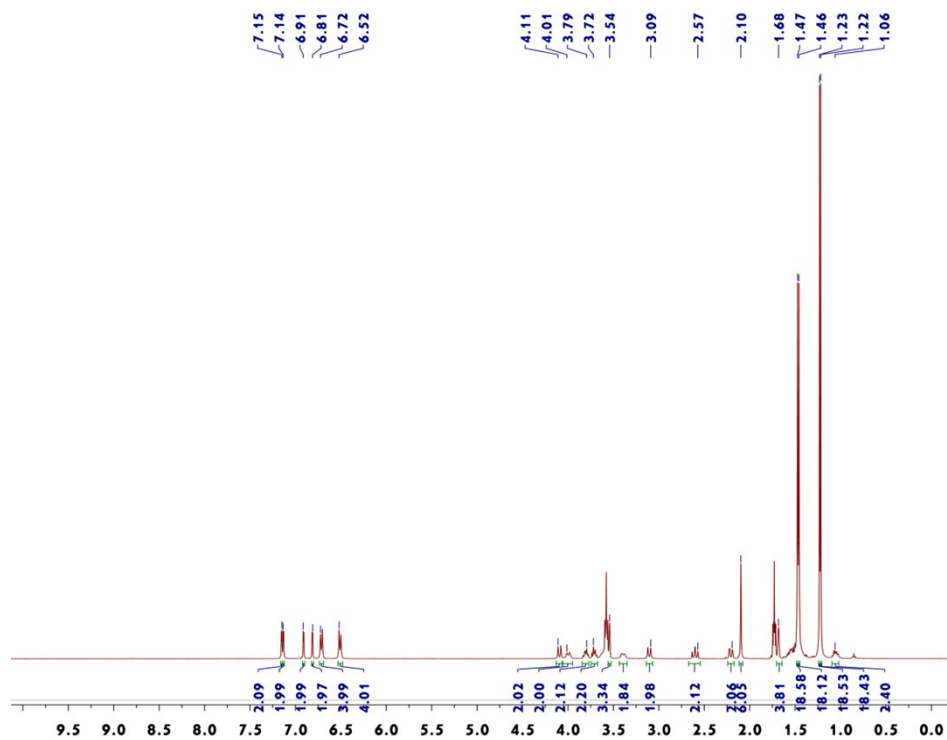

**Fig. S9**  $^1\text{H}$  NMR spectrum ( $d_8$ -THF, 25 °C) of complex **5**

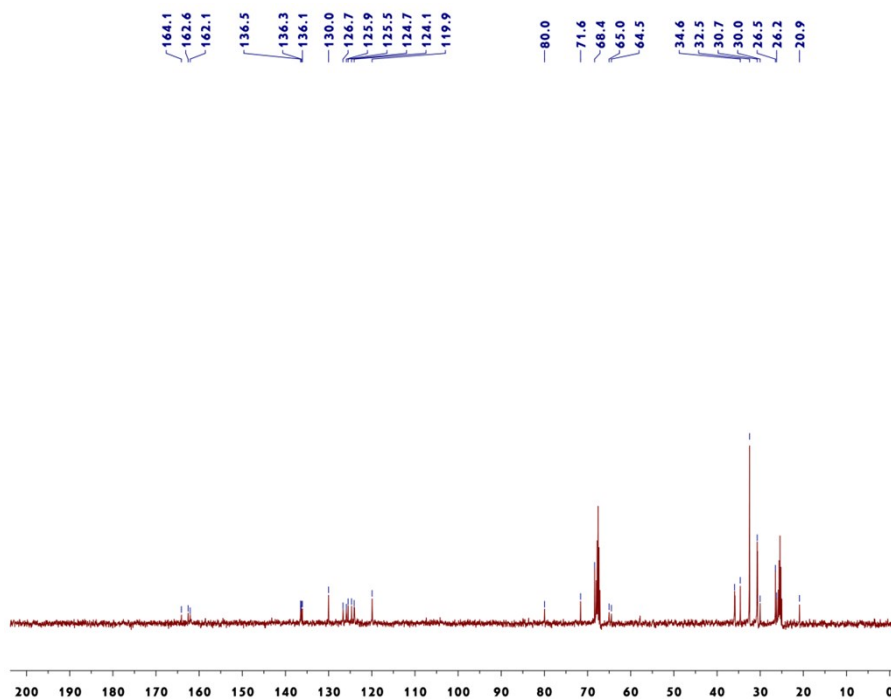

**Fig. S10**  $^{13}\text{C}$  NMR spectrum ( $d_8$ -THF, 25 °C) of complex **5**

**Table S1.** Crystallographic data for complexes **1**, **2**, **3** and **5**

| Compound                                      | <b>1</b>                                                                        | <b>2</b>                                                             | <b>3</b>                                                        | <b>5·3THF</b>                                                                   |
|-----------------------------------------------|---------------------------------------------------------------------------------|----------------------------------------------------------------------|-----------------------------------------------------------------|---------------------------------------------------------------------------------|
| Formula                                       | C <sub>74</sub> H <sub>106</sub> La <sub>2</sub> N <sub>4</sub> O <sub>10</sub> | C <sub>49</sub> H <sub>77</sub> N <sub>2</sub> O <sub>5</sub> L<br>a | C <sub>69</sub> H <sub>85</sub> LaN <sub>2</sub> O <sub>5</sub> | C <sub>180</sub> H <sub>264</sub> N <sub>4</sub> O <sub>19</sub> Y <sub>4</sub> |
| fw                                            | 1489.45                                                                         | 913.03                                                               | 1161.29                                                         | 3143.58                                                                         |
| <i>T</i> /K                                   | 293(2)                                                                          | 100(2)                                                               | 293(2)                                                          | 223(2)                                                                          |
| Crystal system                                | triclinic                                                                       | orthorhombic                                                         | monoclinic                                                      | triclinic                                                                       |
| Crystal size/mm                               | 0.60 x 0.40 x 0.20                                                              | 0.35 × 0.30 × 0.20                                                   | 0.75 x 0.6 x 0.4                                                | 0.80 x 0.70 x 0.30                                                              |
| Space group                                   | P-1                                                                             | Pnma                                                                 | P 1                                                             | P-1                                                                             |
| <i>a</i> /Å                                   | 12.4210(6)                                                                      | 21.8235(10)                                                          | 15.1660(3)                                                      | 15.5796(11)                                                                     |
| <i>b</i> /Å                                   | 12.9473(5)                                                                      | 20.4867(8)                                                           | 33.8032(8)                                                      | 18.2982(14)                                                                     |
| <i>c</i> /Å                                   | 13.3644(7)                                                                      | 10.6023(5)                                                           | 24.5524(6)                                                      | 18.7574(18)                                                                     |
| <i>α</i> /deg                                 | 114.347(4)                                                                      | 90                                                                   | 90                                                              | 75.610(15)                                                                      |
| <i>β</i> /deg                                 | 109.435(5)                                                                      | 90                                                                   | 101.496(2)                                                      | 70.403(14)                                                                      |
| <i>γ</i> /deg                                 | 95.310(4)                                                                       | 90                                                                   | 90                                                              | 66.585(13)                                                                      |
| <i>V</i> /Å <sup>3</sup>                      | 1779.31(16)                                                                     | 4740.2(4)                                                            | 12334.6(5)                                                      | 4581.5(9)                                                                       |
| <i>Z</i>                                      | 1                                                                               | 4                                                                    | 8                                                               | 1                                                                               |
| <i>D</i> <sub>calcd</sub> /g cm <sup>-3</sup> | 1.390                                                                           | 1.279                                                                | 1.251                                                           | 1.139                                                                           |
| <i>μ</i> /mm <sup>-1</sup>                    | 1.243                                                                           | 0.946                                                                | 0.743                                                           | 1.312                                                                           |
| <i>F</i> (000)                                | 772                                                                             | 1928                                                                 | 4880                                                            | 1680                                                                            |
| <i>θ</i> <sub>max</sub> /deg                  | 26.37                                                                           | 27.51                                                                | 26.37                                                           | 26.37                                                                           |
| Collected                                     | 17526                                                                           | 42156                                                                | 74083                                                           | 40070                                                                           |
| Unique reflns                                 | 7289                                                                            | 5581                                                                 | 25165                                                           | 18548                                                                           |
| Obsd reflns<br>[ <i>I</i> > 2.0σ( <i>I</i> )] | 6495                                                                            | 4642                                                                 | 19002                                                           | 11014                                                                           |
| No. of variables                              | 371                                                                             | 295                                                                  | 1471                                                            | 951                                                                             |
| GOF                                           | 1.052                                                                           | 1.072                                                                | 1.060                                                           | 1.071                                                                           |
| <i>R</i>                                      | 0.0368                                                                          | 0.0266                                                               | 0.0447                                                          | 0.0804                                                                          |
| w <i>R</i>                                    | 0.0875                                                                          | 0.0553                                                               | 0.0936                                                          | 0.2251                                                                          |
| <i>R</i> <sub>int</sub>                       | 0.0316                                                                          | 0.0508                                                               | 0.0414                                                          | 0.0675                                                                          |
| Largest diff. peak, hole/e Å <sup>-3</sup>    | 1.573,-<br>1.712                                                                | 0.875, -0.399                                                        | 0.962,-<br>0.755                                                | 1.480, -<br>1.358                                                               |



**Table S2.** Selected bond lengths (Å) and bond angles (deg) for complexes **1-3 and 5**.

| <b>Bond lengths</b> | <b>1</b>   | <b>Bond lengths</b> | <b>2</b>  |
|---------------------|------------|---------------------|-----------|
| Ln1-O1              | 2.465(2)   | Ln1-O1              | 2.285(13) |
| Ln1-O1A             | 2.435(2)   | Ln1-O1A             | 2.285(13) |
| Ln1-O2              | 2.313(2)   | Ln1-O2              | 2.284(2)  |
| Ln1-O3              | 2.289(3)   | Ln1-O3              | 2.608(2)  |
| Ln1-O4              | 2.682(3)   | Ln1-O4              | 2.646(2)  |
| Ln1-N1              | 2.848(3)   | Ln1-N1              | 2.754(2)  |
| Ln1-N2              | 2.730(3)   | Ln1-N2              | 2.755(3)  |
| <b>Bond angles</b>  |            | <b>Bond angles</b>  |           |
| O2-Ln1-N1           | 71.20(8)   | O1-Ln1-O2           | 106.74(4) |
| N2-Ln1-N1           | 63.97(9)   | O2-Ln1-O1A          | 106.74(3) |
| O1A-Ln1-N1          | 106.15(8)  | O1-Ln1-O1A          | 145.52(7) |
| O3-Ln1-N1           | 131.12(9)  | O2-Ln1-N1           | 140.88(8) |
| O3-Ln1-O1           | 86.79(9)   | O1-Ln1-N1           | 74.48(4)  |
| O3-Ln1-O2           | 138.69(10) | O2-Ln1-N2           | 76.84(8)  |
| O3-Ln1-O1A          | 105.72(9)  | O1-Ln1-N2           | 89.85(4)  |
| O2-Ln1-O1A          | 97.01(8)   | N1-Ln1-N2           | 64.04(7)  |
| O1A-Ln1-O1          | 67.67(8)   |                     |           |

| <b>Bond lengths</b> | <b>3</b>   | <b>Bond lengths</b> | <b>5</b>   |
|---------------------|------------|---------------------|------------|
| Ln1-O1              | 2.301(2)   | Ln1-O1              | 2.136(4)   |
| Ln1-O2              | 2.269(2)   | Ln1-O2              | 2.128(4)   |
| Ln1-O3              | 2.270(3)   | Ln1-O3              | 2.339(4)   |
| Ln1-O4              | 2.679(3)   | Ln1-O3A             | 2.263(4)   |
| Ln1-O5              | 2.619(3)   | Ln1-O4              | 2.365(4)   |
| Ln1-N1              | 2.783(2)   | Ln1-N1              | 2.542(5)   |
| Ln1-N2              | 2.809(3)   |                     |            |
| <b>Bond angles</b>  |            | <b>Bond angles</b>  |            |
| O2-Ln1-N1           | 74.26(7)   | O2-Ln1-N1           | 76.66(15)  |
| N1-Ln1-N2           | 63.46(8)   | O3-Ln1-N1           | 127.13(14) |
| O3-Ln1-N1           | 139.95(9)  | O3A-Ln1-N1          | 163.70(15) |
| O4-Ln1-N1           | 77.43(8)   | O4-Ln1-N1           | 67.47(14)  |
| O1-Ln1-O3           | 111.44(10) | O2-Ln1-O3           | 100.19(14) |
| O1-Ln1-O4           | 84.00(8)   | O2-Ln1-O3A          | 104.36(14) |
| O3-Ln1-O4           | 141.24(9)  | O3-Ln1-O3A          | 69.02(15)  |
| O4-Ln1-O5           | 68.92(9)   | O4-Ln1-O3A          | 119.38(14) |

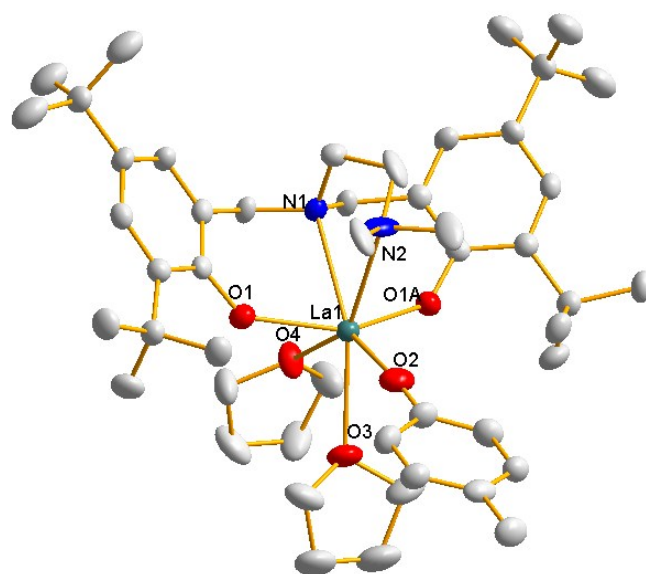

**Fig. S11** Solid state structure of complex **2** showing an atom numbering scheme. Thermal ellipsoids are drawn at 30% probability level, and hydrogen atoms are omitted for clarity.

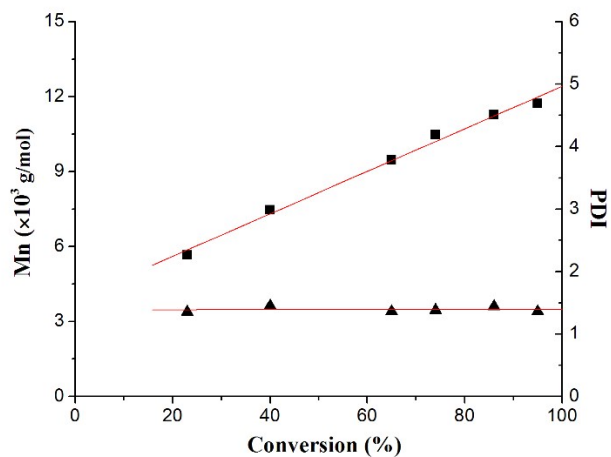

**Fig. S12** Plot of PLA Mn(■) and polydispersity (▲) as a function of  $L$ -lacOCA conversion initiated by complex **5**,  $[OCA]_0/[I]_0=200:1$ ,  $T=30\text{ }^\circ\text{C}$ .

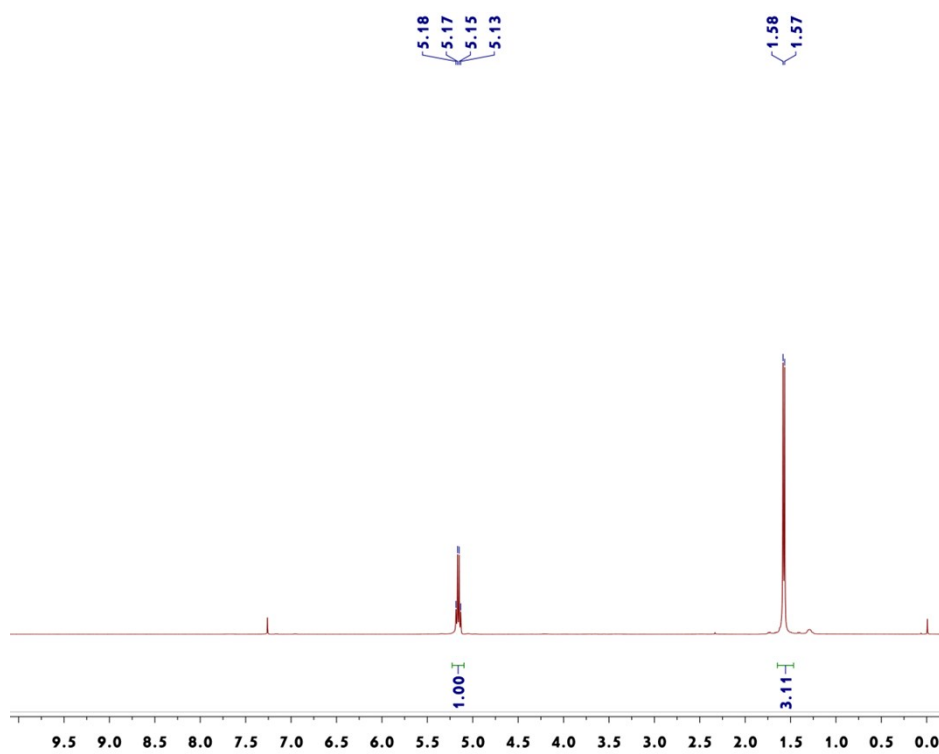

**Fig. S13**  $^1\text{H}$  NMR (normal) spectrum of PLLA obtained from  $L$ -lacOCA by complex **5**.

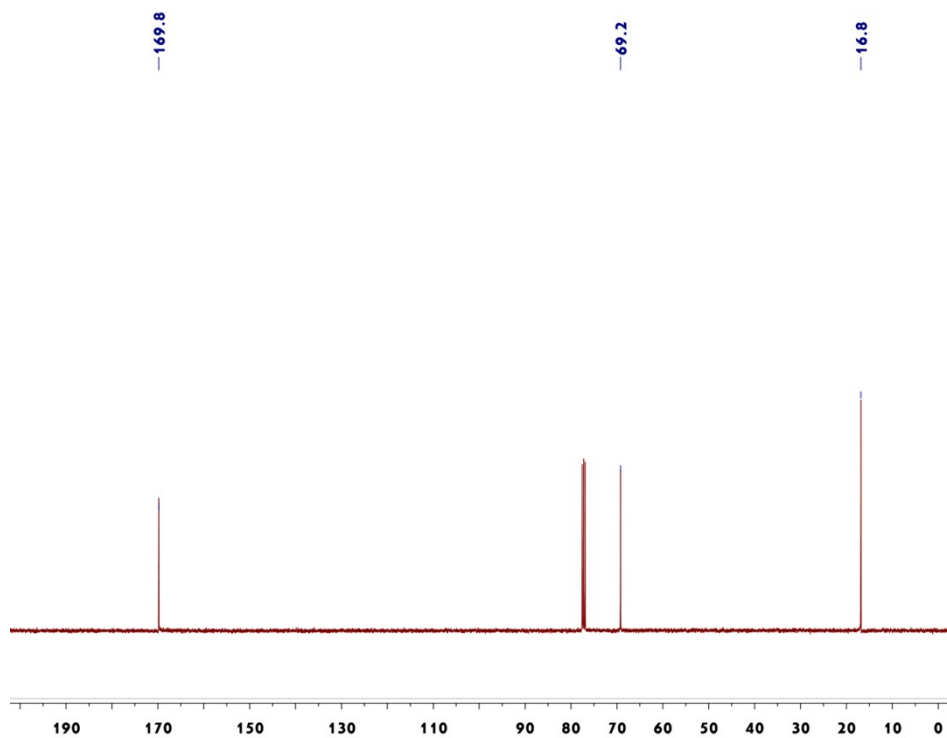

**Fig. S14**  $^{13}\text{C}$  NMR spectrum of PLLA obtained from  $L$ -lacOCA

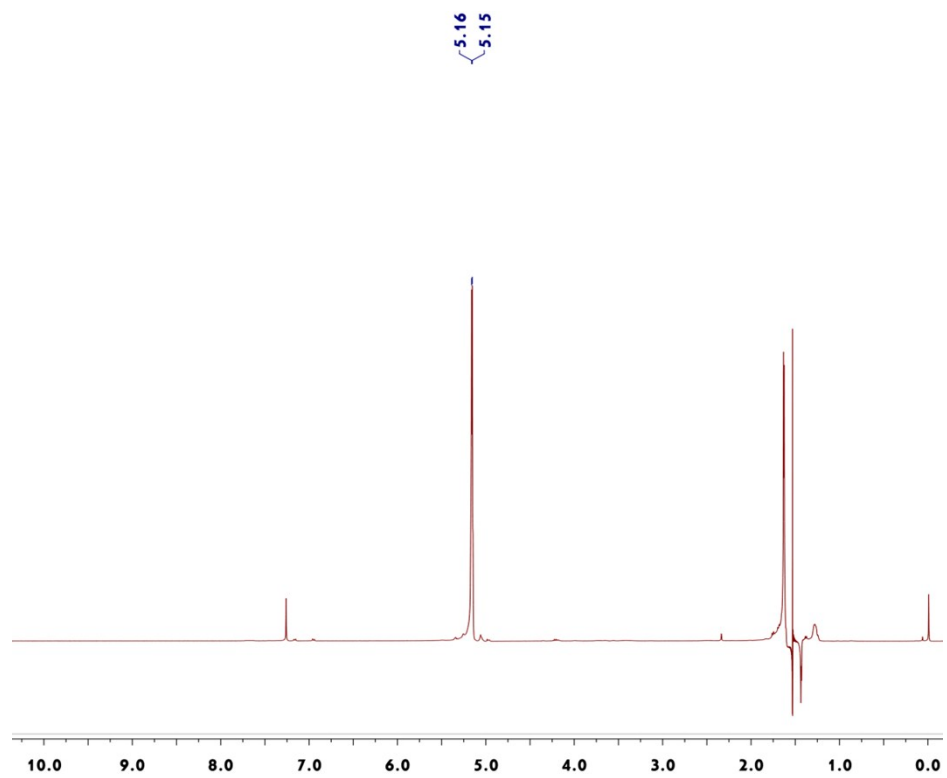

**Fig. S15**  $^1\text{H}$  NMR (homodecoupled) spectrum of PLLA obtained from  $L$ -lacOCA

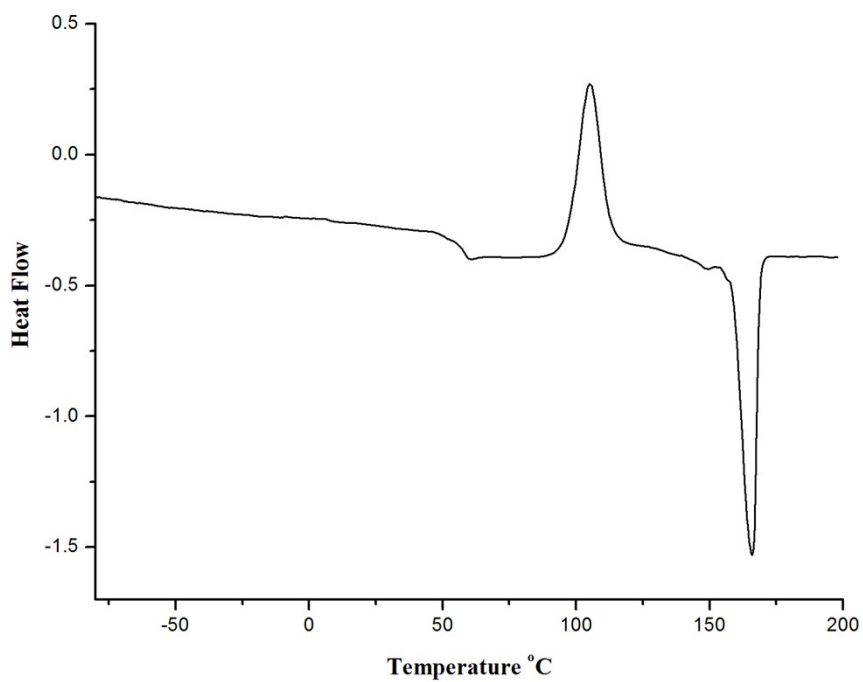

**Fig. S16** DSC thermogram of poly(lactic acid)

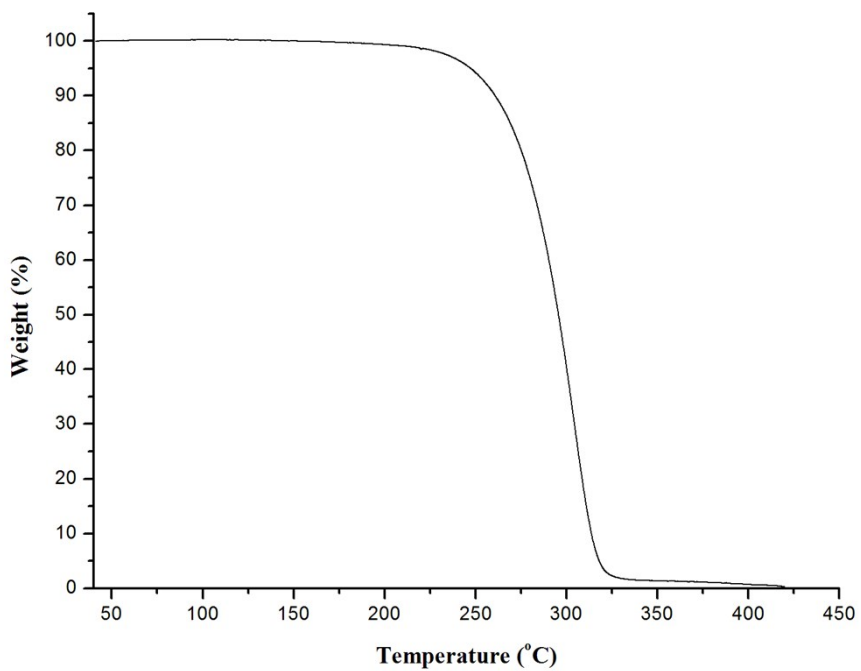

**Fig. S17** TGA thermogram of poly(lactic acid)
